# Supplementary material for: Gene regulation by low level UV-B radiation: identification by DNA array analysis
Source: Royal Society of Chemistry journal article supplement (doi:10.1039/b202659g), 2002-07-23
Supplement: b202659g-2.pdf [file b202659g-2.pdf]

**Fig. S1.** Conserved direct and inverted elements in *PAL*, *CHI*, *CHS* and *PR-5* promoters. Elements conserved among seven UV-B inducible promoters (*MEB5.2*, *PyroA*, *Ubg3*, *CHI*, *CHS*, *PAL* and *PR-5*) identified in pairwise BLASTN comparisons are with solid arrows shown in their direct and inverted orientations, respectively, with slashes indicating single mismatches. Only those elements containing two or more guanine and cytosine identities in a minimum of seven contiguous nucleotides are displayed. The regions in these promoters sharing the identities are designated with numbers following each gene designation. To further clarify orientation, the designation for inverted elements are underlined.

CHI

AATTATCTCAATAACCAAAATATATAAAATCAATAATATGAAAGATAACGATAGAAAATATTTGAAATATATCCTAACATATGCTCTGCATATTTAAGG -218  
GCTCAAGCTTCAACCAAAATTTGCAATGCATCTCCCAATCAAAAATATAAAAAAGAGACGAAAACGAAAGTACACGTGTTACACATCCAACACTCGT -118  
AATCGTAACATATTGCTACCTACCCTCTCTCTCTACTTAACCCCAAAGGCCCAAAAACACAATCAAGAAAAGCTCTGTAACATTTATCAATCGAAA -18  
TTCCAAACCGACTCAACAATG -3

CHS

ACTCTACGGCGTCTACGCCCTCGCATGCCTATCATATTTAACCGTCAATAATGGATTTGGCGGTTTTGGTAGCCGGGCAACCGGATTAAGAAAACGG -989  
TTGGAGTCTCTCTTGCATTTGAATTTTACGCATCGGGTTTTGTGATTTCTCTGTCTATAATGGCCCGGCACATATGGTTTACATAACCCATGTGGGCT -889  
ATGGTATAATTTTCCAATTAACAATTTGTTAGTTCGATAAAAACAAAACAATAAAAACGAGTGAATACACATACAAAAGAATGTGATGAACATT -789  
AGTAATTTTATTTGATGGTTAATGAAAAACAAAATAATGCATCTTGACATCTCCCGTTGGAAAGCGCAAAATAGGCAGATTTTCAGACAGATATCACTA -689  
TGATGGGGGTGGGAGAAAACAGGCGTACTTAATGTAACACTACTTAATAGTCGTTAGTTATAGGACTTTTTTTTTGGGCTAGTTATAG -589  
GATCATAAGTAAAAATGAAGAATGAATATTAGATTAGTAGGAGCTAATGATGGAGTTAAGTAGTATGCACGTGTAAGAAGTGGAAAGTGAACCTCCTG -489  
TATGGTGAAGAACTATACAACAAGCCCTTTGTGGTGTATACGTATTAATTTTTATTCTTTTATCACAAAGCGATACGTACTCTTAAGACATAATAAATA -389  
TATATCTTACTCATAATAATATCTTAAGATATAATATACAGTATACACCTGTATATATAATAAATAGGCATATAGTAGAAAATTAATAGTTGTTGT -289  
TGTTCGAAATATATAAATCAATCAAAAAGAAATTAACCCACCATTCCAATCTGGTAAAGTAAACGAAAACAGGGAAGCAAGAAGAACCCAGAAAAGGG -189  
GGCTAACAACTAGACACGTAGATCTTCTATCGCCCGTCCATCTAACCTACCACACTCTCATCTCTTTTTCCCGTGTGAGTTGTTATATAAGCTCTCAC -89  
TCTCCGGTATATTTCCAATACACCTAAGTTGTTAGTACACAAACGCAACATAAATCAATCAATATACCAAGTTGGTGTACTATAATG -3

PAL

TTTCACAAAATTTTATACTCAATTAACAATAACGAAAATGTACATTTGTATCTTTAACTATTTACGTTTTTTTTTACGTATCAACTTTCAGTTATATGTT -937  
TTGGATAATATATTTTTTACTTTTACTTTTCACTTTTACCTAATGATTGGGATATACATATGCATGCATAGTTCCCATTTTAAATGTAAGCTAAG -837  
TGCATATGAACGTGTAGTCAAAATACGAGTTTATTTGTACATATATATAGTTATAACAAAATGGTACAGTAAATTAACAGAACATCAAGAAAGTACA -737  
AAAGCTGAACACATAAATTTTACATGAAAACAAAACACTTAAATAATCATCCGATAAATGAAATGATATCCCAATGACAAAATAACAATATAGAAA -637  
ATACAAAACAAAACAAAATATGAAAGAGTGTATGGTGGGACGTTAATGACTCAATACGTTTACATATATACACACTTCCCATCACATGA -537  
AACGCTTTACTCCAAAAAAGAAAACCACTCTTCAAAAAATCTCGTAGTCTCACCACCGGAAATGCAACTATCGTCAGCCACCGCCAGCACCA -437  
CTTTTACCACCGTGACGTTGACGAAAACCAAGAAATTCACCACCGTGTAAAAATCAAAATTAATAAATCACTCTTTTTGCGACTTAAACCAATCCACG -337  
AATTAATCTCCACCAATAAATCCACTACTCTCCATCTAACGGTCACTTAATTTCTCAACCACTCCTTCTTCTCACTAATTTTCATTTTTT -237  
CTATAATCTTTATATGGAAGAAAAGAAAGACTAGCTATCTCTATACGTTACTACCAACAAACACTACCACCTTATTTAAACCACTTCACTCATCT -137  
AATTTTCTCAGGAACAATAAATCCCTAACCAACAATATACAATAAGCTCCTATCTCTTTCTTTTCTTTAGAGATCTGTAATCTCTCTTAGT -37  
TAATCTCTTATTTGTAAGAACTAAGATCAAAAGTCTAAATG -3

PR5

AAAAGCAACCTCATAGTCAACGGCAAGATCAATTAATTTCTCGGACCAAGTTGGTCAATTTATGAACAGTTTCTACGCTCAAGTCAGTCGTCT -958  
CACCTTATAATCTTTAAGTCTCCCGTCACTAATCACTCCGTTTATATATCACTGATTTTATTTTATTTTCAATAAATATTTTTTTTA -858  
AATACAGATTTTCTCAACTATGTTCTAGACTTCTAGAACCATAAAGATTACAATATATTAATAATGCGGGACAAAACACTACATAACGATACCATTTA -758  
ACGTACGAAATATTTCTAATTTTACTTTCGTTTATAACCAGATTTTATACCTGTTTAGATGTTTACTGTTTTAAAACTACACATTCATGGTCATGGAG -658  
GATATGATATCTAAAACCTTAGGATCAAGCTTCCGGTTCAGTAGCAAAATCAGGCTCTTATGATGCATCTGTTCCGGTCTTATAATCGAGGATTC -558  
CACCAAAATAAAAGCATCGATCTATTCCGGTTTATACAATCATACTCATGGTTTACAACAGTCAACAACACATCTATCTGGTCACTGGATCTCAA -458  
CTCGACCTCACAACAATAATCTAACCGATCCGGATCTCATATTCATTCGTTGATCACAATTAGACACATCTAATTTGGATCTCATAGTCGGGATCAC -358  
Ubg3-1  
AATTAATCTATCTATACAGATATCATACTCGGACCAACACATCAGATGACATAAAACATCACACTGAACCTTAAGTTTGTAGTGTGATCATGACG -258  
ATGCCGAGTCAAAATGTTAAGATTTTTTTTTTACCATTTATAGTAACTAATGGAAATAAAACAGTAATGCAAGAAAATTCAGAGAACCAGAA -158  
ATATCTATCAAGACCAAAAATCTAATGATTAATCATGACAACATTACGCTCACCCTCGAACCAACATCTATAAATAGAGGATCGGTGCCATTA -58  
ACATTCATCATCATCACCACAGCACAGAGACACACAAAAACCCATAAAAAATATG -3
