# Supplementary material for: Gene regulation by low level UV-B radiation: identification by DNA array analysis
Source: Royal Society of Chemistry journal article supplement (doi:10.1039/b202659g), 2002-07-23
Supplement: b202659g.doc [file b202659g.doc]

**Supplementary data**

**Table S1**

| **DNA microarray analysis** | |  | |
| --- | --- | --- | --- |
|  |  | |  |
| UV-B regulated clones identified with DNA microarray analysis. RNA was isolated from leaves of  *Arabidopsis thaliana* Columbia 0 plants irradiated with UV-BBE= 0.137 W/m2 for 3 hours. A positive  value indicates induction (up-regulation) whereas a negative value indicates repression (down-regulation)  of mRNA transcripts. Genes marked in red were used for northern blot analysis. The annotation is based  on sequencing from Monsanto (in black) or in our department (in red). | | | |
|  |  | |  |
|  |  | |  |
| Fold change | Genecode or SmartBlast  Hit ID (gi) | | Gene description |
|  |  | |  |
|  |  | |  |
| 9 | MEB5.2 | | Unknown protein |
| 7,4 | F24K9.8 | | Protein phosphatase 2C (PP2C) |
| 7 | T911.8 | | Unknown protein |
| 6,2 | T22E19.1 | | Putative zinc finger protein similar to zinc finger protein 6 |
| 5,8 | MLD14.3 | | Cysteine proteinase |
| 5,6 | T10O8.120 | | Putative PyroA, pyridoxine biosynthesis |
| 5,5 | MPN9.19 | | Monosaccharide transport protein |
| 5 | F508.26 | | Unknown protein |
| 4,6 | T3F24.21 | | Unknown protein |
| 4,5 | T1J1.5 | | Putative WD-repeat membrane protein |
| 4,4 | 1345973 | | Omega-3 fatty acid desaturase, endoplasmic  reticulum |
| 4,2 | 7448240 | | Probable caffeoyl-CoA O-methyltransferase (EC 2.1.1.104)  F28A23.190 - Arabidopsis thaliana |
| 4,2 | 5882738 | | (AC008263) Contains 3 PF|01535 DUF17 domains. |
| 4,1 | 8809628 | | (AB019234) Contains similarity to carboxyl-terminal  proteinase~gene_id:MKN22.4 |
| 4,1 | 10177953 | | (AB026651) Aluminum-induced protein-like |
| 4 | 124372 | | Acetolactate synthase, chloroplast precursor (Acetohydroxy-  acid synthase) (ALS) |
| 3,6 | 9294409 | | (AB025629) Polygalacturonase inhibitor-like protein |
| 3,6 | MXK3.30 | | MADS box transcription factor |
| 3,6 | 11272444 | | Phosphoribosylformylglycinamidine cyclo-ligase precursor –  Arabidopsis thaliana |
| 3,5 | 7488102 | | Probable ethylene-inducible protein F16M14.16 –  Arabidopsis thaliana |
| 3,5 | 6166164 | | Flavonol synthase (FLS) |
| 3,5 | 7549643 | | (AC023912) Ribosomal protein L29, putative |
| 3,5 | T4D2.40 | | RNA helicase-like protein |
| 3,2 | 1346194 | | Glutathione reductase, cytosolic (GR) (GRASE)  (OBP29) |
| 3,2 | 6983866 | | (AP001168) ESTs C26056(C11550),AU082131(C11550)  correspond to a region of the predicted gene.; Similar to  Arabidopsis thaliana DNA chromosome 4, ESSA I FCA  contig fragment No. 8; hypothetical protein (Z97343) |
| 3,2 | T5J17 | | GTP-binding protein GB3 |
| 3,2 | 6017107 | | (AC009895) RGA1-like protein |
| 3,1 | 8469184 | | CHONDROITIN SULFATE PROTEOGLYCAN NG2  PRECURSOR (HSN TUMOUR-SPECIFIC ANTIGEN) |
| 3,1 | 11119233 | | (AF312696) mekk |
| 3 | 7487986 | | Outer envelope membrane protein homolog T6H20.230 –  Arabidopsis thaliana |
| 2,9 | 12229666 | | 4-Coumarate--CoA ligase 3 (4CL 3) (4-coumaroyl-CoA  synthase 3) |
| 2,9 | 2281113 | | (AC002333) Putative endochitinase |
| 2,8 | 7469320 | | Fibrillin - Synechocystis sp. (strain PCC 6803) |
| 2,7 | 11278888 | | Transcription regulator, probable TC0483 {imported} –  Chlamydia muridarum (strain Nigg) |
| 2,7 | 7518564 | | Hypothetical protein PH0283 - Pyrococcus horikoshii |
| 2,7 | 4587572 | | (AC006550) Similar to gb|U70015 lysosomal trafficking  regulator from Mus musculus and contains  2 PF|00400 WD40, G-beta repeats.  ESTs gb|T43386 and gb|AA395236 come from this gene. |
| 2,7 | F18F4.120 | | DAG-like protein DAG precursor |
| 2,6 | F15A17.270 | | Polyubiqutin (UBQ3) |
| 2,6 | 9964117 | | (AF287697) Half-molecule ABC transporter ATM1 |
| 2,6 | 11358588 | | Nucleoid DNA-binding protein cnd41-like protein –  Arabidopsis thaliana |
| 2,5 | 1403138 | | (X98190) Peroxidase ATP2a |
| 2,5 | T23J18.30 | | Pseudogene putative RNA polymerase II subunit Rpb 10 |
| 2,4 | 1703091 | | Acyl carrier protein, mitochondrial precursor (ACP)  (NADH-UBIQUINONE OXIDOREDUCTASE 9.6 KDA  SUBUNIT) (MTACP-1) |
| 2,3 | F309.7 | | Putative Ser/Thr protein kinase |
| 2,3 | 417527 | | Pathogenesis-related protein 1 precursor (PR-1) |
| 2,2 | 7433013 | | Catalase (EC 1.11.1.6) - Arabidopsis thaliana |
| 2,2 | 7484929 | | DNA-binding protein F4I18.20 - Arabidopsis thaliana |
| 2,2 | 4432856 | | (AC006300) Putative dioxygenase |
| 2,2 | 12328547 | | (AP002913) Nucleoid DNA-binding protein cnd41-like protein |
| 2,2 | 6498419 | | (AP000815) Similar to Arabidopsis thaliana DNA chromosome  4, BAC clone F22K18 (AL035356) |
| 2,1 | 4432856 | | (AC006300) Putative dioxygenase |
| 2,1 | 5360792 | | (AB027252) f-AtMBP |
| 2,1 | 1169278 | | Dehydrin ERD14 |
| 2,1 | 6755622 | | Alpha-spectrin 1, erythroid |
| 2,1 | 5091620 | | (AC007454) Contains similarity to gi|836774 FAB1 protein  from Saccharomyces cerevisiae genome gb|D50617. |
| -2,1 | 8927661 | | (AC034256) Identical to Lhcb6 protein from Arabidopsis  thaliana gb|AF134130 and is a member of the  Chlorophyll A-B binding proteins PF|00504. |
| -2,1 | 9998817 | | (AJ278970) LPG2 protein |
| -2,1 | 115385 | | Chlorophyll a-b binding protein 4 precursot (LHCI type III  CAB-4) (LHCP) |
| -2,1 | 112739 | | 2S seed storage protein 2 precursor (2S albumin storage  protein ) |
| -2,2 | 4176420 | | (AB008097) Cytochrome P450 |
| -2,2 | 7443228 | | Chlorophyll a/b-binding protein F24G24.140 –  Arabidopsis thaliana |
| -2,3 | 683723 | | (X02608) FLP |
| -2,3 | F5024.300 | | Monogalactosyldiacylglycerol synthase |
| -2,3 | MGD8.26 | | Putative S-adenosylmethionine synthetase |
| -2,4 | 9294537 | | (AB024034) DnaJ-like protein |
| -2,5 | 9294650 | | (AP000600) Lipase/acylhydrolase; myrosinase-associated  protein |
| -2,6 | 11292138 | | Hypothetical protein {imported} - Arabidopsis thaliana |
| -2,7 | F7H2.16 | | Chlorophyll binding protein (Lhcb6 ) |
| -2,8 | F5D21.10 | | Unknown protein |
| -3 | 4836947 | | (AC006085) Putative photosystem II 5 KD protein |


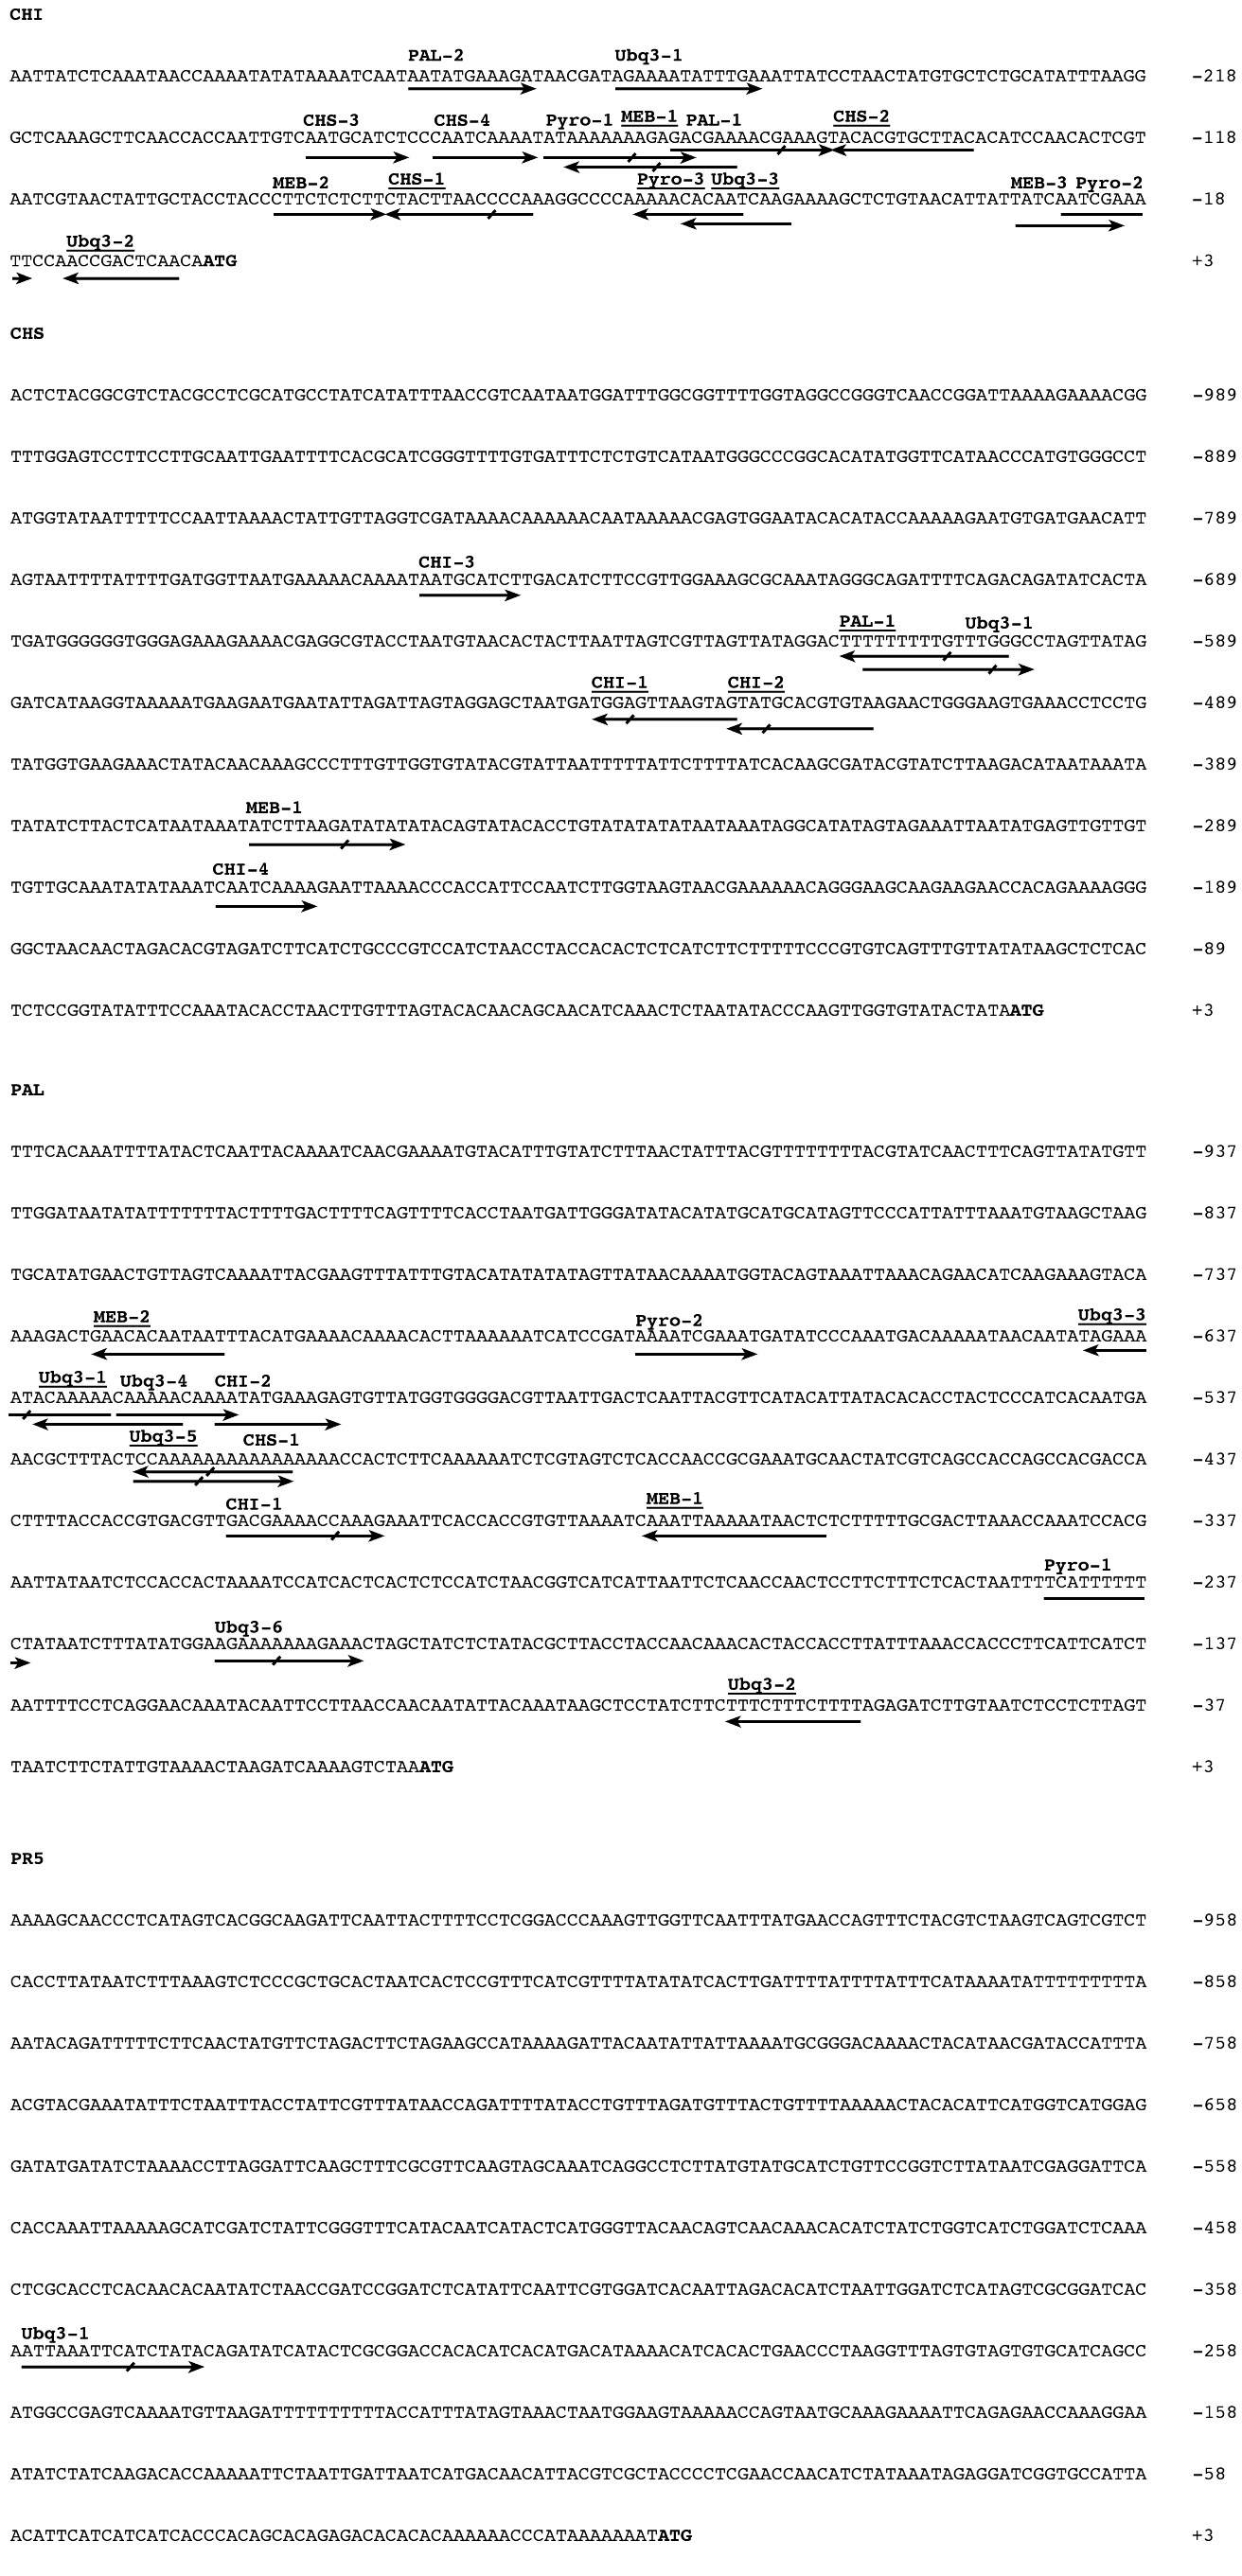


**Fig. S1.** Conserved direct and inverted elements in ***PAL, CHI***, ***CHS*** and ***PR-5*** promoters. Elements conserved among seven UV-B inducible promoters (***MEB5.2***, ***PyroA***, ***Ubq3***, ***CHI***, ***CHS***, ***PAL*** and ***PR-5***) identified in pairwise BLASTN comparisons are with solid arrows shown in their direct and inverted orientations, respectively, with slashes indicating single mismatches. Only those elements containing two or more guanosine and cytosine identities in a minimum of seven contiguous nucleotides are displayed. The regions in these promoters sharing the identities are designated with numbers following each gene designation. To further clarify orientation, the designation for inverted elements are underlined.
