# Supplementary material for: Gene regulation by low level UV-B radiation: identification by DNA array analysis
Source: Royal Society of Chemistry journal article supplement (doi:10.1039/b202659g), 2002-07-23
Supplement: b202659g.pdf [file b202659g.pdf]

## DNA microarray analysis

UV-B regulated clones identified with DNA microarray analysis. RNA was isolated from leaves of *Arabidopsis thaliana* Columbia 0 plants irradiated with UV-B<sub>BE</sub> = 0.137 W/m<sup>2</sup> for 3 hours. A positive value indicates induction (up-regulation) whereas a negative value indicates repression (down-regulation) of mRNA transcripts. Genes marked in red were used for northern blot analysis. The annotation is based on sequencing from Monsanto (in black) or in our department (in red).

| Fold change | Genecode or SmartBlast<br>Hit ID (gi) | Gene description                                                                                                           |
|-------------|---------------------------------------|----------------------------------------------------------------------------------------------------------------------------|
| 9.0         | MEB5.2                                | Unknown protein                                                                                                            |
| 7.4         | F24K9.8                               | Protein phosphatase 2C (PP2C)                                                                                              |
| 7.0         | T911.8                                | Unknown protein                                                                                                            |
| 6.2         | T22E19.1                              | Putative zinc finger protein similar to zinc finger protein 6                                                              |
| 5.8         | MLD14.3                               | Cysteine proteinase                                                                                                        |
| 5.6         | T10O8.120                             | Putative PyroA, pyridoxine biosynthesis                                                                                    |
| 5.5         | MPN9.19                               | Monosaccharide transport protein                                                                                           |
| 5.0         | F508.26                               | Unknown protein                                                                                                            |
| 4.6         | T3F24.21                              | Unknown protein                                                                                                            |
| 4.5         | T1J1.5                                | Putative WD-repeat membrane protein                                                                                        |
| 4.4         | F15H11.14                             | Putative auxin transport protein, REH1                                                                                     |
| 4.4         | F23F1.10                              | Omega-3 fatty acid desaturase, endoplasmic reticulum                                                                       |
| 4.2         | F28A23.190                            | Probable caffeoyl-CoA O-methyltransferase                                                                                  |
| 4.2         | F25A4.18                              | Hypothetical protein                                                                                                       |
| 4.1         | MRP15.17                              | Unknown protein                                                                                                            |
| 4.1         | F5N5.2                                | Similar to aluminum-induced protein                                                                                        |
| 4.0         | T8P19.70                              | Acetolactate synthase, chloroplast precursor                                                                               |
| 3.7         | T1B3.18                               | Hypothetical protein                                                                                                       |
| 3.6         | 9294409                               | Polygalacturonase inhibitor-like protein                                                                                   |
| 3.6         | MXK3.30                               | MADS box transcription factor                                                                                              |
| 3.6         | T15C9.10                              | Phosphoribosylformylglycinamide cyclo-ligase                                                                               |
| 3.5         | F16M14.16                             | Probable ethylene-inducible protein (similar to SOR1 singlet oxygen resistance protein from <i>Cercospora nicotianae</i> ) |
| 3.5         | MAH20.20                              | Flavonol synthase                                                                                                          |
| 3.5         | MCB17.5                               | Putative 40S ribosomal protein S10                                                                                         |
| 3.5         | T4D2.40                               | RNA helicase-like protein                                                                                                  |
| 3.4         | F16P17.17                             | Unknown protein                                                                                                            |
| 3.2         | MUJ8.3                                | Glutathione reductase                                                                                                      |
| 3.2         | T5J17                                 | GTP-binding protein GB3                                                                                                    |
| 3.2         | T21P5.13                              | RGA1-like protein                                                                                                          |
| 3.1         | MAC9.6                                | Putative protein Mt N19                                                                                                    |
| 3.1         | M4E13.70                              | β-galactosidase-like protein                                                                                               |
| 3.1         | MIL23.12                              | Unknown protein                                                                                                            |
| 3.1         | MLP3.21                               | Unknown protein                                                                                                            |
| 3.0         | T6H20.230                             | Chloroplast import-associated channel protein                                                                              |
| 2.9         | 12229666                              | 4-Coumarate-CoA ligase 3                                                                                                   |

|      |                   |                                                                                                                   |
|------|-------------------|-------------------------------------------------------------------------------------------------------------------|
| 2.9  | 2281113           | (AC002333) Putative endochitinase                                                                                 |
| 2.8  | 7469320           | Similar to fibrillin <i>Synechocystis</i> (strain PCC 6803)                                                       |
| 2.7  | 11278888          | Similar to transcription regulator, from <i>Chlamydia muridarum</i> (strain Nigg)                                 |
| 2.7  | 7518564           | Similar to hypothetical protein PH0283 from <i>Pyrococcus horikoshii</i>                                          |
| 2.7  | 4587572           | (AC006550) Similar to lysosomal trafficking regulator from <i>Mus musculus</i> . Contains 2 WD40, G-beta repeats. |
| 2.7  | <b>F18F4.120</b>  | <b>DAG-like protein DAG precursor</b>                                                                             |
| 2.6  | <b>F15A17.270</b> | <b>Polyubiquitin (UBQ3)</b>                                                                                       |
| 2.6  | 9964117           | (AF287697) Half-molecule ABC transporter ATM1                                                                     |
| 2.6  | 11358588          | Nucleoid DNA-binding cnd41-like protein                                                                           |
| 2.5  | 1403138           | (X98190) Peroxidase ATP2a                                                                                         |
| 2.5  | <b>T23J18.30</b>  | <b>Pseudogene putative RNA polymerase II subunit Rpb 10</b>                                                       |
| 2.4  | 1703091           | Acyl carrier protein, mitochondrial precursor (NADH-ubiquinone oxidoreductase 9.6 kDa SUBUNIT)                    |
| 2.3  | <b>F309.7</b>     | <b>Putative Ser/Thr protein kinase</b>                                                                            |
| 2.3  | 417527            | Pathogenesis-related protein 1 precursor (PR-1)                                                                   |
| 2.2  | 7433013           | Catalase                                                                                                          |
| 2.2  | 7484929           | DNA-binding protein F4I18.20                                                                                      |
| 2.2  | 4432856           | (AC006300) Putative dioxygenase                                                                                   |
| 2.2  | 12328547          | (AP002913) Nucleoid DNA-binding protein cnd41-like protein                                                        |
| 2.2  | 6498419           | (AP000815) Similar to Arabidopsis thaliana DNA chromosome 4, BAC clone F22K18 (AL035356)                          |
| 2.1  | 4432856           | (AC006300) Putative dioxygenase                                                                                   |
| 2.1  | 5360792           | (AB027252) f-AtMBP                                                                                                |
| 2.1  | 1169278           | Dehydrin ERD14                                                                                                    |
| 2.1  | 6755622           | Alpha-spectrin 1, erythroid                                                                                       |
| 2.1  | 5091620           | (AC007454) Contains similarity to FAB1 protein from <i>Saccharomyces cerevisiae</i>                               |
| -2.1 | 8927661           | (AC034256) Lhcb6 protein                                                                                          |
| -2.1 | 9998817           | (AJ278970) LPG2 protein                                                                                           |
| -2.1 | 115385            | Chlorophyll a-b binding protein 4 precursor (LHCI type IIICAB-4)                                                  |
| -2.1 | 112739            | 2S seed storage protein 2 precursor (2S albumin storage protein )                                                 |
| -2.2 | 4176420           | (AB008097) Cytochrome P450                                                                                        |
| -2.2 | 7443228           | Chlorophyll a/b-binding protein F24G24.140                                                                        |
| -2.3 | 683723            | (X02608) FLP                                                                                                      |
| -2.3 | <b>F5024.300</b>  | <b>Monogalactosyldiacylglycerol synthase</b>                                                                      |
| -2.3 | <b>MGD8.26</b>    | <b>Putative S-adenosylmethionine synthetase</b>                                                                   |
| -2.4 | 9294537           | (AB024034) DnaJ-like protein                                                                                      |

|      |          |                                                                |
|------|----------|----------------------------------------------------------------|
| -2.5 | 9294650  | (AP000600) Lipase/acylhydrolase; myrosinase-associated protein |
| -2.6 | 11292138 | Hypothetical protein                                           |
| -2.7 | F7H2.16  | Chlorophyll binding protein (Lhcb6)                            |
| -2.8 | F5D21.10 | Unknown protein                                                |
| -3.0 | 4836947  | (AC006085) Putative photosystem II 5 KD protein                |
